# Supplementary material for: Analysis of the anti-fatigue activity of polysaccharides from Spirulina platensis: role of central 5-hydroxytryptamine mechanisms
Source: Royal Society of Chemistry journal article supplement (doi:10.1039/c9fo02804h), 2020-01-01

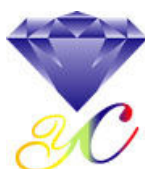

武汉远成共创科技有限公司  
WUHAN YUANCHENG GONGCHUANG TECHNOLOGY CO.,LTD

质量报告单  
CERTIFICATE OF ANALYSIS

|                           |                       |                       |            |
|---------------------------|-----------------------|-----------------------|------------|
| 产品名称<br>Product name      | 螺旋藻多糖                 |                       |            |
| CAS 号<br>CAS No.          | 无                     | 包装规格<br>Outer Packing | 1kg/袋      |
| 生产日期<br>Production date   | 2017.11.23            | 有效期<br>Shelf life     | 2019.11.22 |
| 执行标准<br>Standard adopted  |                       |                       |            |
| 分析项目<br>Items of analysis | 质量标准<br>Specification | 实测结果<br>Results       |            |
| Appearance                | Brownish green powder | Complies              |            |
| Odor                      | Characteristic        | Complies              |            |
| Assay                     | Polysaccharide≥70.0%  | 70.13%                |            |
| Sieve analysis            | NLT100% pass 80 mesh  | Complies              |            |
| Insolubles in water       | ≤5.0%                 | 3.25%                 |            |
| Residue on Ignition       | ≤3.0%                 | 2.78%                 |            |
| Heavy Metal               | ≤10 ppm               | Complies              |            |
| As                        | <2.0 ppm              | Complies              |            |
| Pb                        | <1.0 ppm              | Complies              |            |
| Cd                        | <1.0 ppm              | Complies              |            |
| Hg                        | <0.1 ppm              | Complies              |            |
| Residual Solvents         | Eur.Pharm             | Complies              |            |
| Storage                   | <10000cfu/g           | Complies              |            |
| Yeast & Mould             | <100cfu/g             | Complies              |            |
| E.Coli                    | Negative              | Complies              |            |
| Salmonella                | Negative              | Complies              |            |
| S.aureus                  | Negative              | Complies              |            |
| 结论<br>Conclusion          | 合格<br>Qualified       |                       |            |

主管:  
Director:

检查员: 李淑敏  
Scrutator:

化验员: 刘浩  
Analyst:

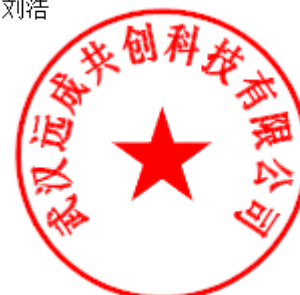

Supplement: c9fo02804h1.pdf [file c9fo02804h1.pdf]
